# Supplementary material for: Harnessing genetic potential of wheat germplasm banks through impact-oriented-prebreeding for future food and nutritional security
Source: PubMed Central journal article supplement (PMC6104032; doi:10.1038/s41598-018-30667-4), 2018-08-21
Supplement: 41598_2018_30667_MOESM1_ESM.pdf [file 41598_2018_30667_MOESM1_ESM.pdf]

1 **Harnessing genetic potential of wheat germplasm banks through impact-oriented-**  
2 **prebreeding for future food and nutritional security**

3  
4 Sukhwinder Singh<sup>1\*†</sup>, Prashant Vikram<sup>1†</sup>, Deepmala Sehgal<sup>1†</sup>, Juan Burgueño<sup>1</sup>, Achla Sharma<sup>2</sup>,  
5 Sanjay K. Singh<sup>3</sup>, Carolina P. Sansaloni<sup>1</sup>, Ryan Joynson<sup>4</sup>, Thomas Brabbs<sup>4</sup>, Cynthia Ortiz<sup>1</sup>,  
6 Ernesto Solis-Moya<sup>5</sup>, Velu Govindan<sup>1</sup>, Naveen Gupta<sup>6</sup>, Harminder S. Sidhu<sup>6</sup>, Ashwani K.  
7 Basandrai<sup>7</sup>, Daisy Basandrai<sup>7</sup>, Lourdes Ledesma-Ramires<sup>5</sup>, Maria P. Suaste-Franco<sup>5</sup>, Guillermo  
8 Fuentes-Dávila<sup>8</sup>, Javier I. Moreno<sup>9</sup>, Kai Sonder<sup>1</sup>, Vaibhav K. Singh<sup>10</sup>, Sanjay Singh<sup>11</sup>, Sajid  
9 Shokat<sup>12,13</sup>, Mian A. R. Arif<sup>12</sup>, Khalil A. Laghari<sup>13</sup>, Puja Srivastava<sup>2</sup>, Sridhar Bhavani<sup>14</sup>, Satish  
10 Kumar<sup>3</sup>, Dharam Pal<sup>15</sup>, Jai P. Jaiswal<sup>16</sup>, Uttam Kumar<sup>6</sup>, Harinder K. Chaudhary<sup>7</sup>, Jose Crossa<sup>1</sup>,  
11 Thomas S. Payne<sup>1</sup>, Muhammad Imtiaz<sup>18</sup>, Virinder S. Sohu<sup>2</sup>, Gyanendra P. Singh<sup>3</sup>, Navtej S.  
12 Bains<sup>2</sup>, Anthony Hall<sup>4,19</sup>, Kevin V. Pixley<sup>1\*</sup>

13  
14 <sup>1</sup>International Maize and Wheat Improvement Center (CIMMYT), Carretera México-Veracruz Km. 45, El Batán,  
15 Texcoco, México, C.P. 56237

16 <sup>2</sup>Department Plant Breeding & Genetics, Punjab Agriculture University, Ludhiana-141004, India

17 <sup>3</sup>ICAR-Indian Institute of Wheat and Barley Research, Karnal-132001, India

18 <sup>4</sup>Earlham Institute, Norwich, Norfolk, NR4 7UG, UK

19 <sup>5</sup>Carretera Celaya-San Miguel de Allende, Km .6.5, C.P. 38110, Celaya, Guanajuato, México

20 <sup>6</sup>Borlaug Institute for South Asia (BISA), CIMMYT, Ladhawal, Punjab, 141004, India

21 <sup>7</sup>CSK Himachal Pradesh Agricultural University Palampur, H.P. India, 176062

22 <sup>8</sup>INIFAP-CIRNO, Campo Experimental Norman E. Borlaug, Apdo. Postal 155, Km 12 Norman E. Borlaug, Cd.  
23 Obregon, Sonora, Mexico CP 85000

24 <sup>9</sup>INIFAP, Interior Parque Los Colomos S/N, Colonia Providencia, CP. 44660, Guadalajara, Jalisco

25 <sup>10</sup>ICAR-Indian Agricultural Research Institute (IARI), New Delhi - 110 012, INDIA

26 <sup>11</sup>National Research Center for Plant Biotechnology, New Delhi - 110 012, INDIA

27 <sup>12</sup>Nuclear Institute for Agriculture and Biology, Faisalabad -38000, Pakistan

28 <sup>13</sup>Department of Plant and Environmental Sciences, Crop Science, University of Copenhagen, Højbakkegård Allé 13,  
29 DK-2630, Taastrup, DENMARK

30 <sup>14</sup>Nuclear Institute of Agriculture, Tando Jam, Sindh, - 70050, Pakistan,

31 <sup>15</sup>CIMMYT - World Agroforestry Centre (ICRAF), United Nations Avenue, Gigiri. P.O. Box 1041–00621, Nairobi,  
32 Kenya

33 <sup>16</sup>ICAR-Indian Agricultural Research Institute, Regional Station, Shimla-171004, India

34 <sup>17</sup>Department of Genetics & Plant Breeding, G.B. Pant University of Agriculture & Technology, Pantnagar- 263145  
35 Uttarakhand, India

36 <sup>18</sup>CIMMYT – Pakistan, NARC CSI Complex, Park Road, Islamabad- 44000, Pakistan

37 <sup>19</sup>School of Biological Sciences, University of East Anglia, Norwich Research Park, Norwich NR4 7TJ, UK

38  
39 <sup>†</sup>Equal contributions

40 <sup>\*</sup>Corresponding authors:

41 Sukhwinder Singh | Wheat Lead- Seeds of Discovery

42 International Maize and Wheat Improvement Center (CIMMYT)

43 Tel: +52 (595) 952 1900 (2104) Email: suk.singh@cgiar.org

44 Kevin Pixley | Director, Genetic Resources Program

45 International Maize and Wheat Improvement Center (CIMMYT)

46 Carretera México-Veracruz Km. 45, El Batán, Texcoco, México, C.P. 56237

47 Tel: +52-595-9521900 (1397) Email: k.pixley@cgiar.org

48

49

50

1 **Supplementary Table 1. Haplotype variation among three sets of germplasm; exotic, pre breeding,**  
 2 **and elite**  
 3

| Chromosome | Germplasm set | Total number of haplotypes | Length of haplotypes (number of SNPs in a haplotype): min to max | Genomic regions in PBLs where large HBs in elites were broken (genetic position in cM based on 64K map) |
|------------|---------------|----------------------------|------------------------------------------------------------------|---------------------------------------------------------------------------------------------------------|
| 1A         | Elite         | 10                         | 2-36                                                             |                                                                                                         |
|            | Exotic        | 33                         | 2-7                                                              |                                                                                                         |
|            | PBLs          | 32                         | 2-10                                                             | 190.3-194.7, 195.8- 196.6, 204.3-204.7, 206.7-207.0, 208.1-218.3, 225.2-226.0, 226.4-228.4, 313.4-343.3 |
| 1B         | Elite         | 4                          | 2-3                                                              |                                                                                                         |
|            | Exotic        | 23                         | 2-8                                                              |                                                                                                         |
|            | PBLs          | 14                         | 2-5                                                              |                                                                                                         |
| 1D         | Elite         | 1                          | 4                                                                |                                                                                                         |
|            | Exotic        | 14                         | 2-6                                                              |                                                                                                         |
|            | PBLs          | 11                         | 2-3                                                              | 75-78                                                                                                   |
| 2A         | Elite         | 7                          | 2-6                                                              |                                                                                                         |
|            | Exotic        | 19                         | 2-3                                                              |                                                                                                         |
|            | PBLs          | 18                         | 2-6                                                              |                                                                                                         |
| 2B         | Elite         | 9                          | 2-10                                                             |                                                                                                         |
|            | Exotic        | 27                         | 2-5                                                              |                                                                                                         |
|            | PBLs          | 30                         | 2-6                                                              | 68-69                                                                                                   |
| 2D         | Elite         | 3                          | 3-8                                                              |                                                                                                         |
|            | Exotic        | 20                         | 2-8                                                              |                                                                                                         |

|    |        |    |      |                                              |
|----|--------|----|------|----------------------------------------------|
|    | PBLs   | 10 | 2-12 | 114-118                                      |
| 3A | Elite  | 5  | 2-8  |                                              |
|    | Exotic | 16 | 2-5  |                                              |
|    | PBLs   | 20 | 2-5  |                                              |
| 3B | Elite  | 10 | 2-8  |                                              |
|    | Exotic | 23 | 2-5  |                                              |
|    | PBLs   | 33 | 2-6  | 130.8-131.5, 185.4 – 185.6,<br>285.5 – 286.1 |
| 3D | Elite  | 1  | 5    |                                              |
|    | Exotic | 11 | 2-22 |                                              |
|    | PBLs   | 9  | 2-5  |                                              |
| 4A | Elite  | 4  | 3-7  |                                              |
|    | Exotic | 11 | 2-5  |                                              |
|    | PBLs   | 14 | 2-4  | 181.7 – 190.0, 211.0-215.4                   |
| 4B | Elite  | 4  | 2-9  |                                              |
|    | Exotic | 9  | 2-4  |                                              |
|    | PBLs   | 6  | 2-3  |                                              |
| 4D | Elite  | 1  | 3    |                                              |
|    | Exotic | 8  | 2    |                                              |
|    | PBLs   | 6  | 2    |                                              |
| 5A | Elite  | 10 | 2-5  |                                              |
|    | Exotic | 20 | 2-6  |                                              |
|    | PBLs   | 20 | 2-5  |                                              |
| 5B | Elite  | 11 | 2-15 |                                              |
|    | Exotic | 28 | 2-6  |                                              |

|    |        |    |      |                                                           |
|----|--------|----|------|-----------------------------------------------------------|
|    | PBLs   | 37 | 2-4  | 23.3-23.8, 23.9-25.5, 63.7-69.1, 100.4-106.1, 107.2-115.7 |
| 5D | Elite  | 1  | 7    |                                                           |
|    | Exotic | 6  | 2-3  |                                                           |
|    | PBLs   | 3  | 2-5  | 217.9-228.8                                               |
| 6A | Elite  | 5  | 3-8  |                                                           |
|    | Exotic | 13 | 2-4  |                                                           |
|    | PBLs   | 19 | 2-6  | 110.8-112.3                                               |
| 6B | Elite  | 3  | 2-6  |                                                           |
|    | Exotic | 14 | 2-4  |                                                           |
|    | PBLs   | 15 | 2-6  |                                                           |
| 6D | Elite  | 4  | 2-3  |                                                           |
|    | Exotic | 10 | 2-39 |                                                           |
|    | PBLs   | 6  | 2-3  |                                                           |
| 7A | Elite  | 11 | 2-7  |                                                           |
|    | Exotic | 25 | 2-6  |                                                           |
|    | PBLs   | 28 | 2-6  |                                                           |
| 7B | Elite  | 10 | 2-8  |                                                           |
|    | Exotic | 16 | 2-3  |                                                           |
|    | PBLs   | 23 | 2-5  | 61.6-75.1, 76.7-79.0                                      |
| 7D | Elite  | 1  | 2    |                                                           |
|    | Exotic | 21 | 2-23 |                                                           |
|    | PBLs   | 6  | 2-4  |                                                           |

1  
2  
3  
4

1 **Supplementary Table 2. Contribution of exotic and elite alleles in ten crosses with equal to or**  
2 **more than 16 pre-breeding lines selected after 7 cycles of selection (separate excel sheet attached)**

3  
4 **Supplementary Table 3. Haplotype associations with grain yield and related traits (separate excel**  
5 **sheet attached)**

6  
7 **Supplementary Table 4. Haplotype blocks associated with grain yield under heat stress and**  
8 **irrigated situation**

9

| Haplotype | Chromosome | Irrigated       |                    | Heat-2016       |                    | Heat-2017       |                    |
|-----------|------------|-----------------|--------------------|-----------------|--------------------|-----------------|--------------------|
|           |            | <i>P</i> -value | R <sup>2</sup> (%) | <i>P</i> -value | R <sup>2</sup> (%) | <i>P</i> -value | R <sup>2</sup> (%) |
| HB18.1    | 6D         | 9.88E-05        | 2.8                | 3.30E-12        | 6.1                | 5.3076E-07      | 3.7                |
| HB8.22    | 3B         | 8.33E-04        | 3.4                | 6.29E-04        | 3.6                | 0.00204         | 3.0                |
| HB16.10   | 6A         | 3.42E-05        | 4.2                | 9.90E-04        | 3.4                | 0.00045675      | 3.4                |
| HB18.2    | 6D         | 1.38E-06        | 3.7                | 3.30E-12        | 6.2                | 2.44E-04        | 3.0                |

10

1  
2  
3  
4

**Supplementary Table 5A. Haplotype associations for yellow rust resistance in 984 PBLs**

| Haplotype | Chromosome | <i>P</i> -value | Location-PAU | Location-Palampur |
|-----------|------------|-----------------|--------------|-------------------|
| HB1.21    | 1A         | 0.00103         |              |                   |
| HB1.31    | 1A         | 0.000113        |              | **                |
| HB1.32    | 1A         | 8.16E-05        |              | **                |
| HB2.1     | 1B         | 0.000924        |              | ***               |
| HB2.7     | 1B         | 3.76E-06        | **           | **                |
| HB3.4     | 1D         | 0.000426        | ***          |                   |
| HB3.7     | 1D         | 0.000151        |              | **                |
| HB5.2     | 2B         | 0.00155         |              | ***               |
| HB5.23    | 2B         | 0.00138         | **           | **                |
| HB19.4    | 7A         | 1.74E-05        |              | **                |
| HB20.22   | 7B         | 0.00309         | **           | **                |

5 P-Value significance level: \*: < 0.01; \*\*: < 0.01; \*\*\* :<0.0001

6  
7  
8

**Supplementary Table 5B. Haplotype associations for powdery mildew resistance in the pre-breeding germplasm set**

| Haplotype | Chromosome | <i>P</i> -value | R <sup>2</sup> |
|-----------|------------|-----------------|----------------|
| HB14.36   | 5B         | 3.17E-05        | 0.0308         |
| HB17.11   | 6B         | 1.09E-04        | 0.0281         |

9  
10  
11  
12  
13  
14  
15  
16  
17  
18

1 **Supplementary Table 6. Genes found within trait-associated intervals along with their molecular function and genome annotation**  
 2 **(separate excel sheet attached)**

3  
 4 **Supplementary Table 7. Eight allelic variants of gene Traes\_6DS\_84A4D85F.1 with SIFT score <0.05**  
 5

| Variant ID      | Chromosome: bp     | Alleles | Class        | Source             | Conseq.Type      | SIFT | Transcript                  |
|-----------------|--------------------|---------|--------------|--------------------|------------------|------|-----------------------------|
| EPITAEV07251078 | 6D:3099529         | G/C     | SNP          | Inter-homoeologous | Missense variant | 0    | <u>Traes_6DS_84A4FD85F1</u> |
| EPITAEV01106843 | 6D:3099718         | T/G     | SNP          | Inter-homoeologous | Missense variant | 0    | <u>Traes_6DS_84A4FD85F1</u> |
| EPITAEV01106544 | 6D:3099856         | T/C     | SNP          | Inter-homoeologous | Missense variant | 0    | <u>Traes_6DS_84A4FD85F1</u> |
| EPITAEV01106553 | 6D:3099833         | G/A     | SNP          | Inter-homoeologous | Missense variant | 0.01 | <u>Traes_6DS_84A4FD85F1</u> |
| EPITAEV01106611 | 6D:3099439         | C/T     | SNP          | Inter-homoeologous | Missense variant | 0.02 | <u>Traes_6DS_84A4FD85F1</u> |
| EPITAEV01106815 | 6D:3099471         | G/T     | SNP          | Inter-homoeologous | Missense variant | 0.02 | <u>Traes_6DS_84A4FD85F1</u> |
| EPITAEV01106694 | 6D:3099160         | T/C     | SNP          | Inter-homoeologous | Missense variant | 0.03 | <u>Traes_6DS_84A4FD85F1</u> |
| EPITAEV01106840 | 6D:3099708-3099709 | GG/CA   | substitution | Inter-homoeologous | Missense variant | 0.04 | <u>Traes_6DS_84A4FD85F2</u> |

6

1 **Supplementary Table 8A. Pre-breeding lines identified as potential donors for grain yield under**  
 2 **heat stress**

| GID       | Exotic parent type | 2015-16                         | 2016-17 |
|-----------|--------------------|---------------------------------|---------|
|           |                    | ----- kg ha <sup>-1</sup> ----- |         |
| 7641495   | Synthetic          | 2261                            | 2346    |
| 7644075   | Synthetic          | 2325*                           | 2418*   |
| 7645422   | Synthetic          | 2338*                           | 2488*   |
| 7645970   | Synthetic          | 2214                            | 2407*   |
| 7689940   | Landrace           | 2415*                           | 2362    |
| BAJ #1    | Check              | 2144                            | 2216    |
| VOROBAY   | Check              | 1769                            | 1985    |
| SOKOLL    | Check              | NA                              | 2023    |
| LSD(0.05) |                    | 526                             | 386     |

3 In crop season 2015-16 and 2016-17, 984 and 230 PBLs respectively, were evaluated under heat stress  
 4 environment at Ciudad Obregon, Mexico. The number of PBLs with grain yield equal/comparable to Baj#1  
 5 and Vorobey (checks) in 2015-16 were **610** and **908** respectively, and, in 2016-17 they were **165** and **193**  
 6 respectively. \*: PBLs yielding significantly higher than Vorobey.  
 7

8 **Supplementary Table 8B. Pre-breeding lines performing comparable or better than checks for**  
 9 **grain yield under drought stress**

| GID       | Exotic parent type | 2015-16                         | 2016-17            |
|-----------|--------------------|---------------------------------|--------------------|
|           |                    | ----- kg ha <sup>-1</sup> ----- |                    |
| 7643084   | Synthetic          | 3587                            | 4510               |
| 7642492   | Synthetic          | 3480                            | 4574               |
| 7688508   | Landrace           | 3360                            | 4787*              |
| 7687479   | Synthetic          | 3167                            | 5198*              |
| 7642491   | Synthetic          | 2766                            | 5151* <sup>#</sup> |
| VOROBAY   | Check              | 3346                            | 4613               |
| BAJ #1    | Check              | 3111                            | 4858               |
| SOKOLL    | Check              | NA                              | 3968               |
| LSD(0.05) |                    | 868                             | 457                |

10 A total of **984** and **230** PBLs were evaluated in crop season of 2015-16 and 2016-17 respectively, under  
 11 drought stress environment at Ciudad Obregon, Mexico. Of these, grain yield of **940** and **799** PBLs were  
 12 equal/comparable to Baj#1 and Vorobey, in the crop season 2015-16 respectively. In the 2016-17 season,  
 13 PBLs with grain yield equal/ comparable to Baj#1 and Vorobey were **43** and **89**, respectively. \*: **Three**  
 14 PBLs yielded significantly higher than Vorobey in the crop season 2016-17; #: **One** PBL yielded  
 15 significantly higher than Baj#1 in the crop season 2016-17.  
 16

17 **Supplementary Table 9. List of exotics with minor haplotypes associated with agronomic traits**

18 **Supplementary Table 10. List of elites, exotics and pre-breeding lines used in this study. Separate**  
 19 **excel sheet attached.**

20 **10-A: Salient features of the 25 elites that were either released varieties or better performing lines**  
 21 **in CIMMYT's multi-location trials. These elites were used for developing pre-breeding germplasm**  
 22



1 **populations; 10-B: Details of 165 exotics involved in 183 crosses representing 984 pre-breeding**  
 2 **lines; 10-C: Details of 183 three-way crosses representing 984 pre-breeding lines**

3  
 4 **Supplementary Table 11. (A) Details of 10,111 SNP makers used for analysis in this study; (B)**  
 5 **Details of 7,180 SNP markers used for haplotype analysis in this study. Separate excel sheet**  
 6 **attached**

7  
 8 **Supplementary Table 12. Location and size of QTL intervals and number of annotated genes**

| Interval    | Chromosome | Interval start | Interval end  | Interval size (Mbp) | Number of Genes | Number of GY associated genes*<br>(NB-LRR Resistance Associated genes)10 |
|-------------|------------|----------------|---------------|---------------------|-----------------|--------------------------------------------------------------------------|
| HB5.23      | 2B         | 6579864<br>41  | 6902774<br>42 | 32.29               | 279             |                                                                          |
| HB10.5      | 4A         | 1237265<br>09  | 1376101<br>08 | 13.88               | 61              | (GY related genes) 4                                                     |
| HB16.1<br>0 | 6A         | 4180390<br>34  | 4465922<br>70 | 28.55               | 138             | (GY related genes) 14                                                    |
| HB18.1      | 6D         | 4555134        | 6843670       | 2.29                | 48              | (GY related genes) 6                                                     |

10 \*Flagged as previously associated with grain yield by KnetMiner

11  
 12  
 13 **SUPPLEMENTARY FIGURE LEGENDS**

14  
 15 **Fig. S1.** Pictorial presentation of haplotype blocks comparison between of elite and PBL haplotype  
 16 block map. Figure shows the distribution of same 36 SNPs in elite and PBL haplotype map

17  
 18 **Fig. S2.** SNP allele profiles on all 21 chromosomes (columns) for pre-breeding lines (PBLs) of 10  
 19 crosses (rows). Black lines delimit chromosomes and crosses. Black dots inside the black lines are  
 20 missing values, while blue and orange dots represent elite- and exotic-specific alleles, respectively.  
 21 Green color corresponds to unidentified, or alleles originating from recombination of elite and  
 22 exotics. Chromosomal regions where elite, exotic or recombinant alleles prevailed in the PBLs  
 23 appear as vertical patterns of the same color.

24  
 25 **Fig. S3:** Phylogenetic tree of the *Traes\_6DS\_84A4D85F.1* candidate gene, from EnsemblPlants  
 26 database, (<http://plants.ensembl.org/index.html>) showing closest similarity with the gene  
 27 *F775\_22033* in *Aegilops tauschii*, coding for isoflavone reductase IRL-like protein.

28  
 29 **Fig. S4:** BLAST analysis of two SNPs in HB18.1 revealed a significant hit for the SNP 2 (clone  
 30 ID 1067078), with a candidate gene, *Traes\_6DS\_84A4D85F.1*. This gene is homologous to the  
 31 rice gene *LOC\_Os06g27770.1*, coding for isoflavone reductase. Allelic variants are shown in  
 32 UTR, coding and intron regions of the gene (<http://plants.ensembl.org/index.html>). The dark  
 33 yellow colored rectangular boxes represent missense mutations (causing deleterious amino acid  
 34 changes) in the coding region.

35  
 36 **Fig. S5.** Average TKW of PBLs with alleles AC, AT and TC (X-axis) for HB18.2. PBLs with  
 37 haplotype AC had highest TKW. The haplotype AC was present in 6% of PBLs.

38

1 **Fig. S6.** Different regions in the world map (i) to which the exotic parents belong and (ii) where  
2 pre-breeding germplasms have been shared

3

4 **Fig. S7.** Presenting number of crosses made in the last 5 years for wheat pre-breeding and  
5 development stages of germplasm and anticipated product delivery timeline has been illustrated

6

7 **Fig. S8.** Graph showing a three dimensional principal component analysis graph of 1711 gene  
8 bank accessions out of which 244 exotics in different genetic spaces. The selected and unselected  
9 genotypes are presented with red and yellow dots respectively

10

11

12

13

14

15

16

17

18

19

20

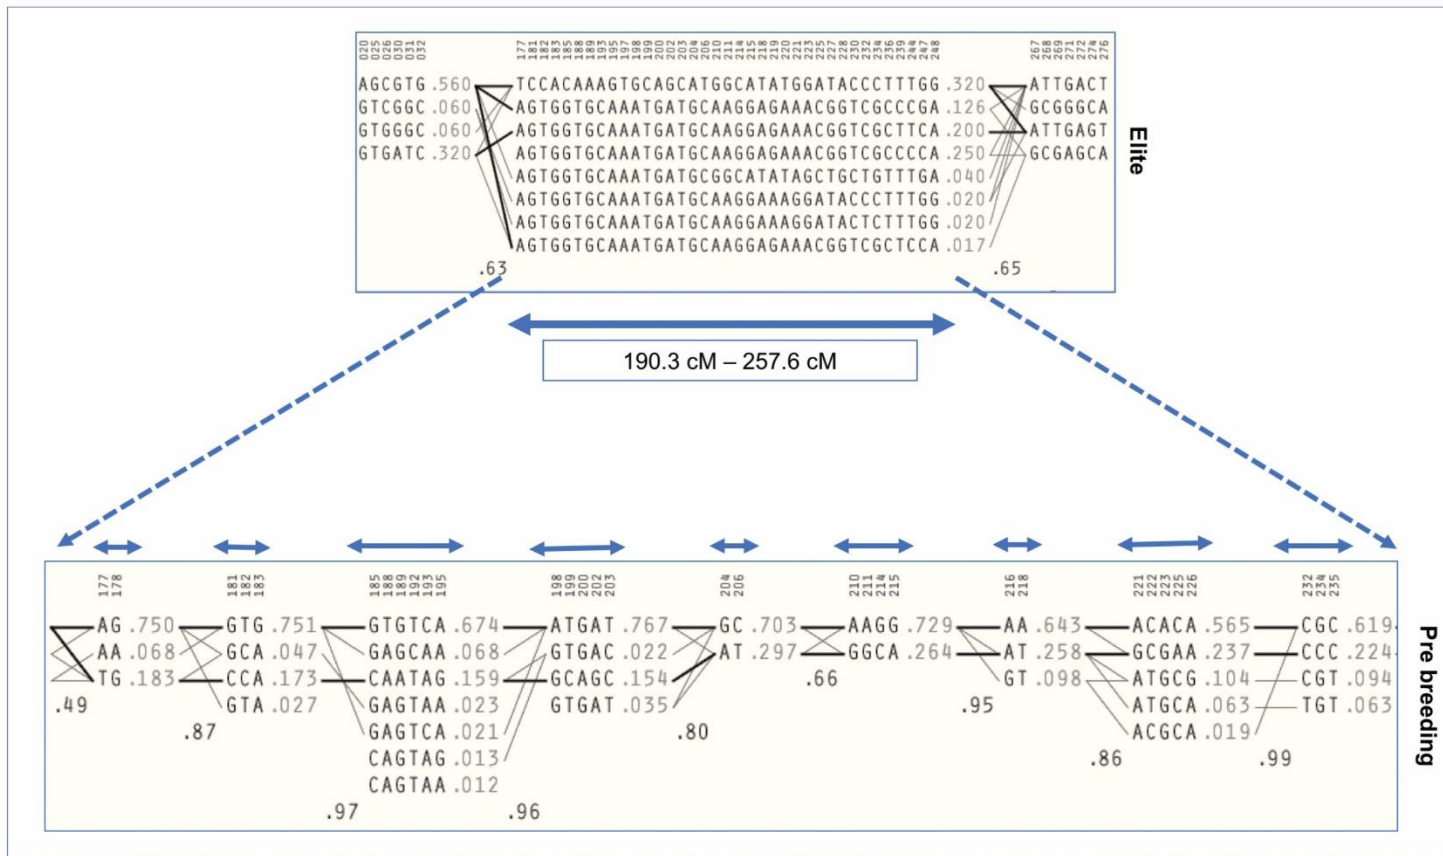

1  
2  
3  
4  
5  
6

Fig.S1

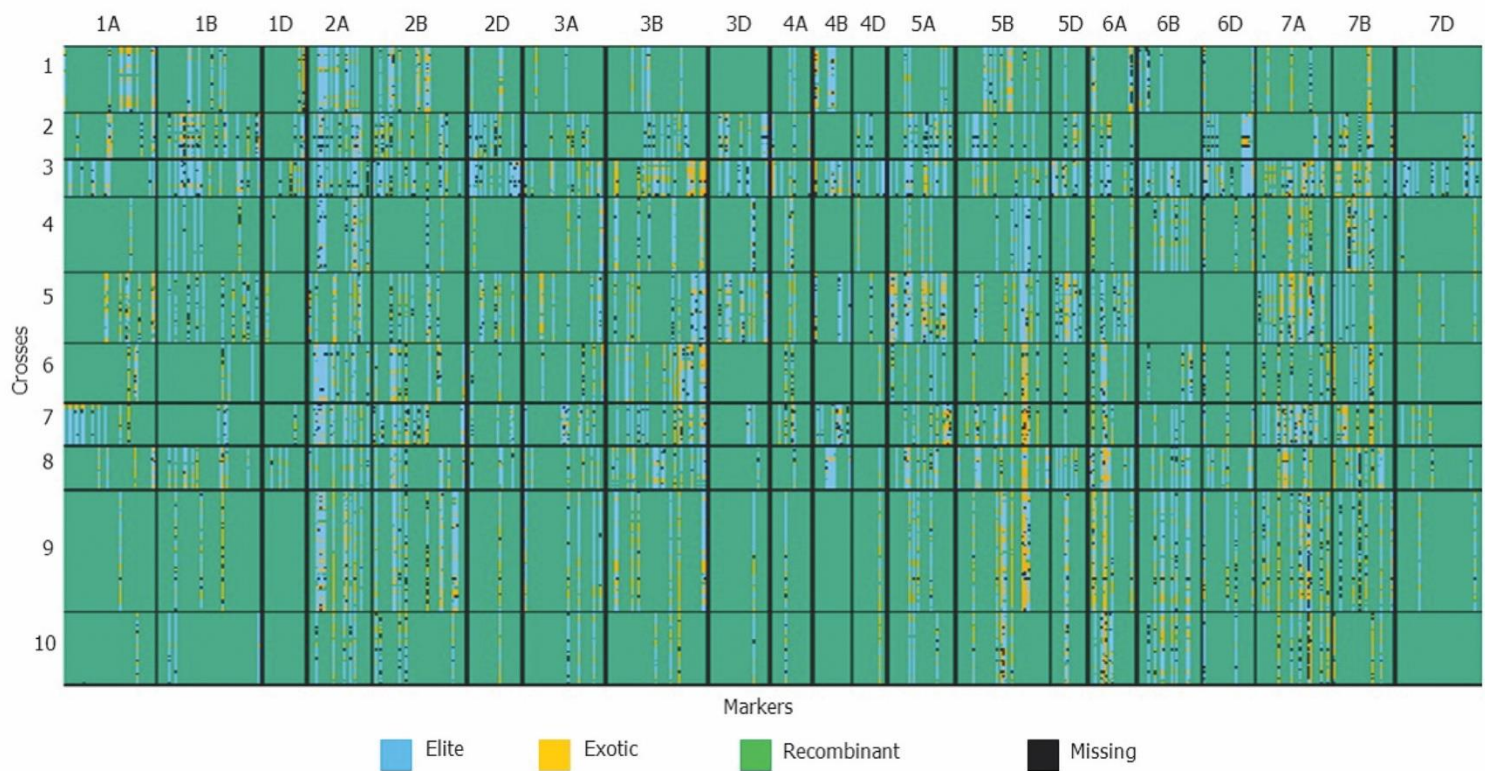

1

2 Fig.S2

3

4

5

6

7

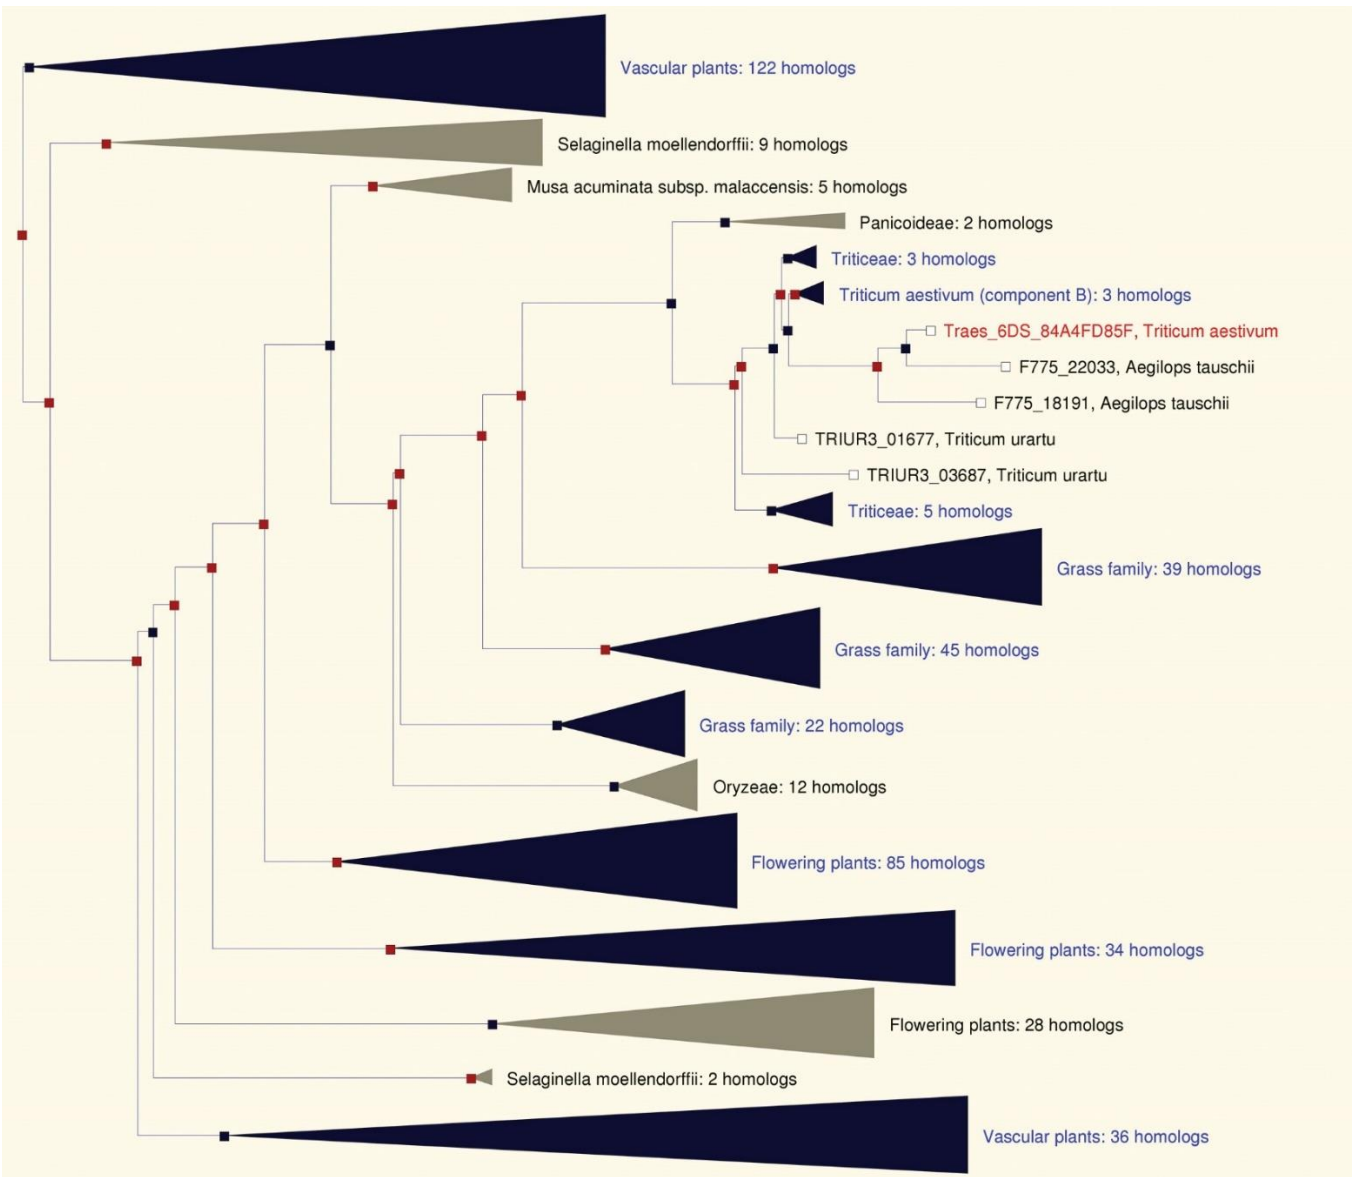

1

2 Fig.S3

1

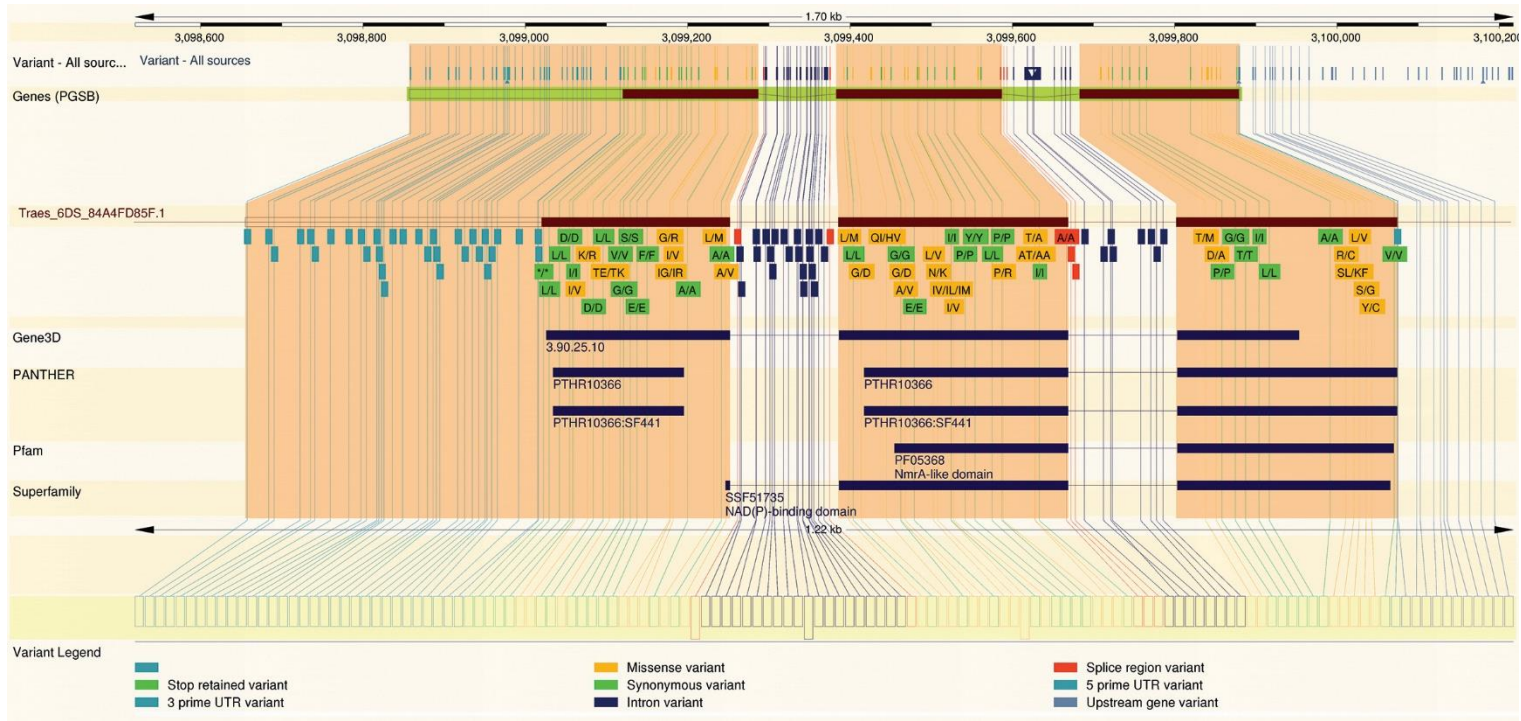

2

3 Fig.S4

4

5

6

7

8

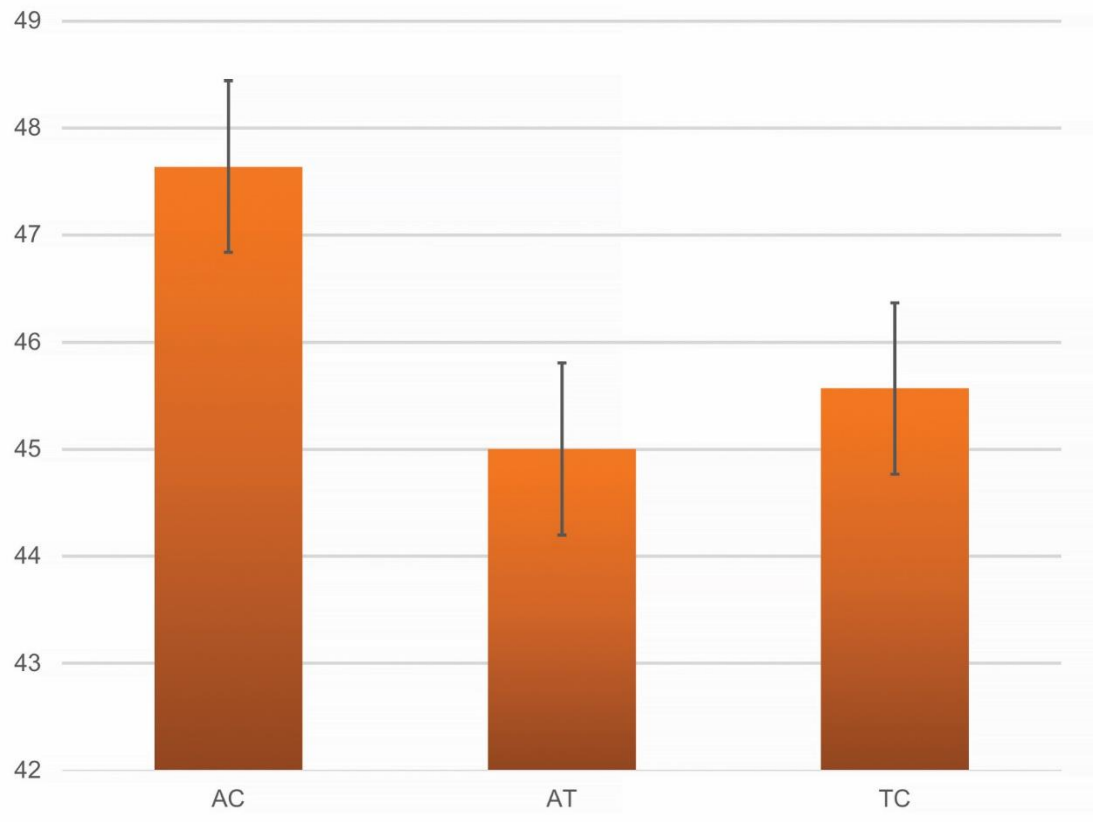

1

2 Fig.S5

3

4

5

6

1

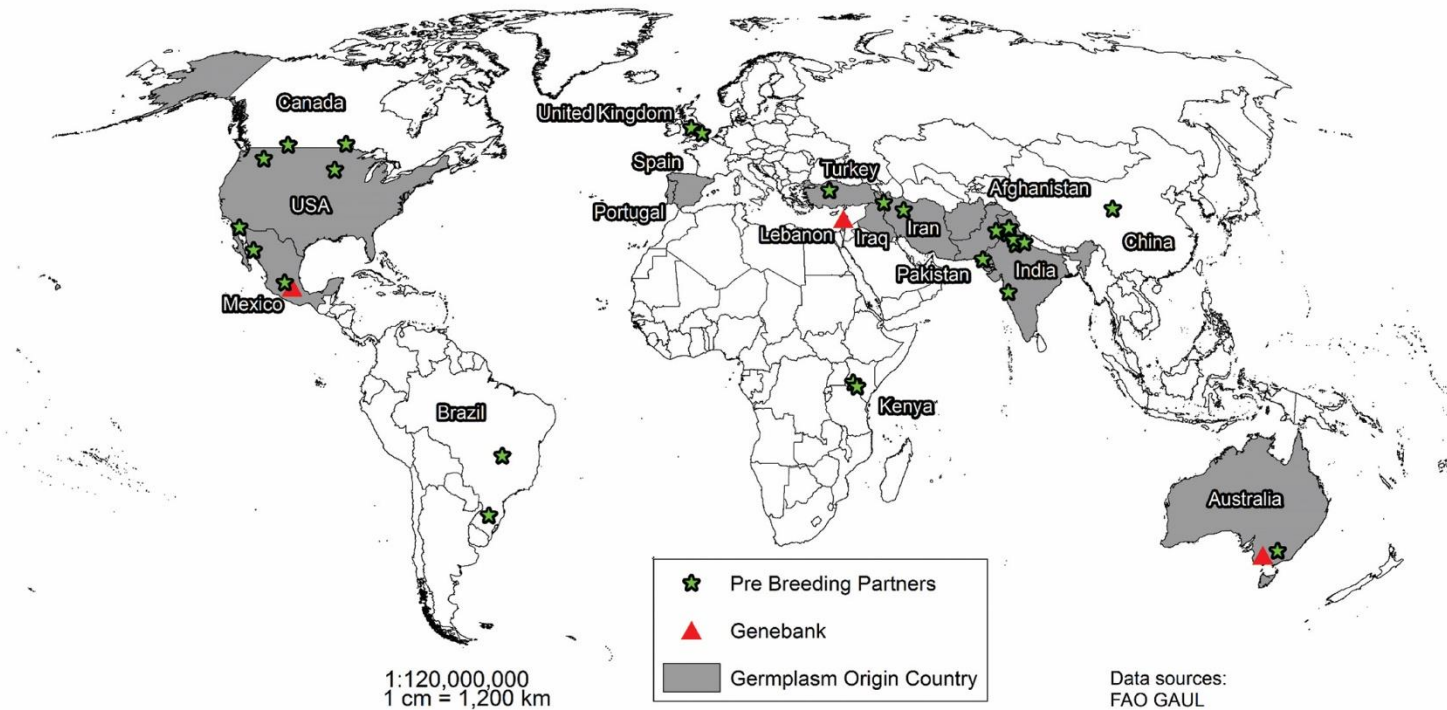

2

3 Fig.S6

4

5

6

7

8



|                                                                                    |                   |                                    |                                      |
|------------------------------------------------------------------------------------|-------------------|------------------------------------|--------------------------------------|
| 2016                                                                               | 200               | 2021                               | TC <sub>1</sub> F <sub>3</sub>       |
|   |                   |                                    |                                      |
| 2015                                                                               | 500               | 2020                               | TC <sub>1</sub> F <sub>4</sub>       |
|   |                   |                                    |                                      |
| 2014                                                                               | 200               | 2019                               | TC <sub>1</sub> F <sub>5</sub>       |
|   |                   |                                    |                                      |
| 2013                                                                               | 126               | 2018                               | TC <sub>1</sub> F <sub>6</sub>       |
|  |                   |                                    |                                      |
| <b>2012</b>                                                                        | <b>244</b>        | <b>2017</b>                        | <b>TC<sub>1</sub>F<sub>7</sub></b>   |
| Crossing Initiated                                                                 | Number of crosses | Mobilization to breeding pipelines | Filial stage of pre breeding product |

1

2 Fig.S7

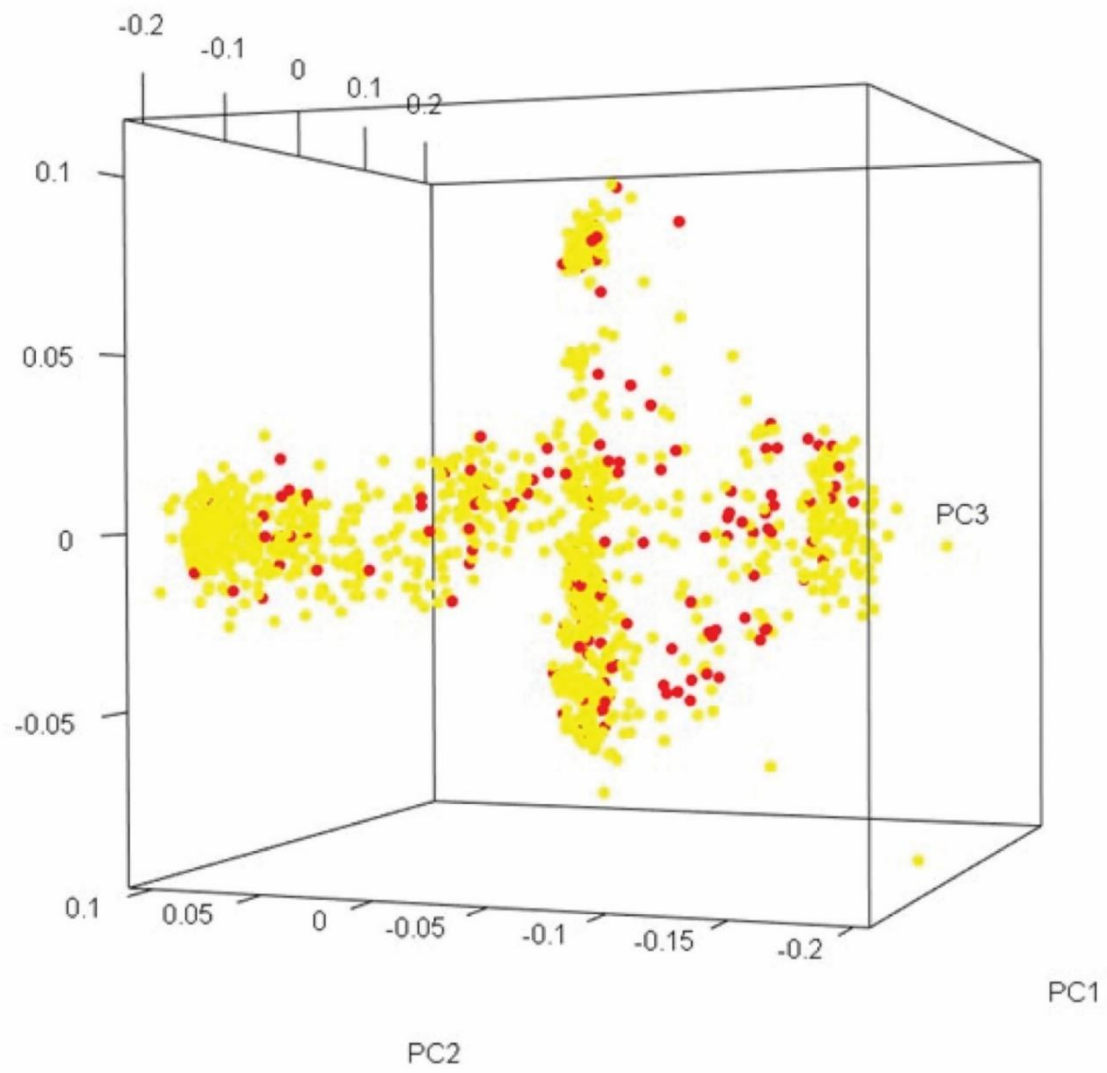

1

2 Fig.S8
